# Supplementary material for: Non-adoption and sustainability of a virtual interprofessional team for primary care in Ontario: A Qualitative Study
Source: Research Square preprint supplement (doi:10.21203/rs.3.rs-6404821/v1), 2025-05-08
Supplement: Supplementary file 1 [file 6523a22335febcae5907fd08.docx]

## Additional File 1 – Interview Guides

## Interview guide Primary Care Providers using MHSCOPE

**Introduction**

Thank you so much for being willing to share some of your experiences with us. [*Explain that the interview is confidential and remind the participant that their confidentiality and their right to withdraw consent will be respected at all times. Explain that the interview will help the research team better understand how SCOPE can help PCPs provide better health care for patients with complex needs.*]

**Background Questions**

1. Can you tell me about your experience as a PCP? *Prompts: Are you a solo practitioner? How long have you been practising? What do you enjoy (not enjoy) about being a PCP? How do you experience the workload?*
2. What do you find difficult in providing care to patients with complex needs? *Prompts: Are there patients you see frequently? Do you feel you can provide adequate care?*
3. What kind of support do you need when providing care to patients with complex needs? *Prompts: How easy or difficult is it for you to get in touch with specialist services? Can you provide care yourself or do you often need to refer patients?*

**SCOPE Questions**

1. When did you first hear about SCOPE? *Prompts: Did you receive information about the Hub (i.e. in print, email, huddles/meetings)? Who provided this information to you? Do you remember what your initial response was to the hub?*
2. Could you describe the purpose and intent of SCOPE? *Prompts: process/how it works; what are the goals; who it is for?*
3. How would you describe your experiences with SCOPE? *Prompts: Timeliness of service? Quality of feedback? Available services? Relation with specialists?*
4. How do you decide whether to contact SCOPE? *Prompts: Can you walk me through a recent case to illustrate your work process? What alternatives do you have between hospital referrals and SCOPE? Do you discuss these options with the resident and where applicable their caregiver/family? Do some patients push for a hospital/specialist referral? And are there conditions for which you would not consider the VCH? Are there residents for whom you feel the virtual hub would not be the right option (e.g., do not transfer directives)?*
5. Could you describe how SCOPE impacts your work flow and workload? *Prompts: Does it help or hinder? In what ways?*
6. What in your view are the main benefits of SCOPE? What are the main downsides? *Prompts:* e.g., health care quality, timeliness of service, satisfaction, quality of life
7. What would you say is the effect of SCOPE on the quality of care you can deliver to patients?
8. What facilities did you need to use SCOPE? *Prompts: Did you need to acquire new technology or infrastructure? Did you require additional trainings?*
9. Would you recommend SCOPE to other PCPs? Why (not)?
10. Are there other services that you would like to see added to SCOPE?
11. Do you have any suggestions for what could have been done differently, any gaps, overall feedback on how SCOPE was rolled out?

**Closing**

1. Is there anything else you want to share about SCOPE that you work in that would be important for us to take into consideration in our evaluation?

Thank you so much for your participation. We’re very grateful to you for sharing your experiences.

##

## Interview guide Primary Care Providers NOT using MHSCOPE

**Introduction**

Thank you so much for being willing to share some of your experiences with us. [*Explain that the interview is confidential and remind the participant that their confidentiality and their right to withdraw consent will be respected at all times. Explain that the interview will help the research team better understand how SCOPE can help PCPs provide better health care for patients with complex needs.*]

**Background Questions**

1. Can you tell me about your experience as a PCP? *Prompts: Are you a solo practitioner? How long have you been practising? What do you enjoy (not enjoy) about being a PCP? How do you experience the workload?*
2. What do you find difficult in providing care to patients with complex needs? *Prompts: Are there patients you see frequently? Do you feel you can provide adequate care?*
3. What kind of support do you need when providing care to patients with complex needs? *Prompts: How easy or difficult is it for you to get in touch with specialist services? Can you provide care yourself or do you often need to refer patients?*

**SCOPE Questions**

1. When did you first hear about SCOPE? *Prompts: Did you receive information about the Hub (i.e. in print, email, huddles/meetings)? Who provided this information to you? Do you remember what your initial response was to the hub?*
2. Could you describe the purpose and intent of SCOPE? *Prompts: process/how it works; what are the goals; who it is for?*
3. What were the reasons you decided not to participate in the SCOPE pilot? *Prompts: Does it not fit in your clinical routines? Do you feel it is not appropriate for your patients? Would it add too much to your workload? Does it offer too limited services?*
4. Would you consider participating in SCOPE once it is more established? *Prompts: At what point would you consider joining SCOPE? What services would need to be available? What kind of support would you like?*
5. Would you recommend SCOPE to other PCPs? Why (not)?
6. Do you have any suggestions for what could have been done differently, any gaps, overall feedback on how SCOPE was rolled out?

**Closing**

1. Is there anything else you want to share about SCOPE that you work in that would be important for us to take into consideration in our evaluation?

Thank you so much for your participation. We’re very grateful to you for sharing your experiences.

## Interview guide General Internal Medicine Physicians

**Introduction**

Thank you so much for being willing to share some of your experiences with us. [*Explain that the interview is confidential and remind the participant that their confidentiality and their right to withdraw consent will be respected at all times. Explain that the interview will help the research team better understand how SCOPE can help PCPs deliver better health care to patients with complex needs.*]

**Background Questions**

1. Can you tell me about your role at Trillium Health Partners, particularly as it pertains to SCOPE?
2. What experience did you have with virtual and remote (e.g. telephone) care before SCOPE?

**SCOPE Questions**

1. Could you describe the purpose and intent of SCOPE? *Prompts: process/how it works; what are the goals; which patients would benefit most from the hub?*
2. Could you give a sense of the types of patients you discuss with PCPs through SCOPE? *Prompts: What kinds of medical conditions or questions do PCPs call about? Do you find that these are mostly chronic illnesses or also acute? Are there cases where you feel SCOPE is not the right pathway?*
3. Can you talk me through an example of a recent call with a PCP? *Prompts: What made this a successful call for you? Did you feel you had a good connection with the PCP? Were there things that did not go well? What was the outcome of that call (e.g., managing care by PCP or referral)? How do you think the process could have been improved? Would you consider this an appropriate case for SCOPE as it is currently implemented?*
4. What is your general impression of SCOPE? *Prompts: Are you happy with the service you provide? How does it affect quality and timeliness of care for patients? Are there aspects you would like to change?* *Is your role in SCOPE clear to you?*
5. How has SCOPE affected your workload? *Prompt: Have there been calls that you felt were unnecessary, that the PCP should be able to handle themselves?* *How easy is it to arrange calls with PCPs? What can get in the way of this timeline? How much time is required for follow-up?*
6. How did you find out about SCOPE? *Prompts: Did you receive information about SCOPE (i.e. in print, email, huddles/meetings)? Who provided this information to you? Do you remember what your initial response was to the hub?*
7. What facilities did you need to use SCOPE? *Prompts: Did you or THP need to acquire new technology or infrastructure? Did you require additional trainings? If so, who provided this?*
8. Would you recommend SCOPE to other hospitals and PCPs? Why (not)?
9. What do you think is needed for SCOPE to be successful long term? *Prompts: What could be challenges for long-term sustainability (e.g. costs, workload)? How many PCPs would SCOPE be able to serve? What kind of support (e.g. institutional, financial) would be needed to accomplish this?*
10. Do you have any suggestions for what could have been done differently, any gaps, overall feedback on how SCOPE was rolled out?

**Closing**

1. Is there anything else you want to share about the virtual hub that would be important for us to take into consideration in our evaluation?

Thank you so much for your participation. We’re very grateful to you for sharing your experiences.

## Interview guide SCOPE Project Team

**Introduction**

Thank you so much for being willing to share some of your experiences with us. [*Explain that the interview is confidential and remind the participant that their confidentiality and their right to withdraw consent will be respected at all times. Explain that the interview will help the research team better understand how the virtual care hub can help long-term care homes deliver better health care to residents.*]

**Background Questions**

1. Can you tell me a bit about your role at Trillium Health Partners?
2. What is your role in relation to SCOPE?

**SCOPE Questions**

1. Could you describe the purpose and intent of SCOPE? *Prompts: process/how it works; what are the goals; which patients and PCPs would benefit most from the hub?*
2. Can you describe the process of developing and implementing SCOPE? *Prompts: What did you see as the main problem that SCOPE should solve? Who do you see as the main beneficiaries (e.g., specific groups of PCPs)? What were the reasons to choose a virtual consult? Did you consider other pathways than virtual care? If so, which? Why was the GIM chosen to be the first pathway for SCOPE? Who was involved in the process?*
3. What do you hope SCOPE will accomplish? *Prompts: What does success look like to you?*
4. What do you expect will be the impact of SCOPE on the health care experiences of patients? *Prompts: How about their quality of care? And their quality of life?*
5. How did you reach out to PCPs to offer them participation in SCOPE? Can you give an example to illustrate how this worked? *Prompts: What responses did you get? What motivated PCPs to participate? For those who were hesitant, why do you think they were not keen?*
6. What kind of training did you offer PCPs to help them implement SCOPE? *Prompts: protocols, materials*
7. What do you see as the main challenges for PCPs in using SCOPE?
8. What are the main challenges for the GIMs and the hospital?
9. What other services do you think would be good to add to SCOPE?
10. What adaptations could be made to make SCOPE more effective and/or efficient?
11. How do you see the future of SCOPE? *Prompts: What support do you need for sustainability? And what about spread and scale up of SCOPE?*
12. Do you have any suggestions for what could have been done differently, any gaps, overall feedback on SCOPE?

**Closing**

1. Anything else you want to share about SCOPE that would be important for us to take into consideration in our evaluation?

Thank you so much for your participation. We’re very grateful to you for sharing your experiences.
